# Supplementary material
Source: PubMed Central journal article supplement (PMC9822978)
Supplement: 41431_2022_1217_MOESM4_ESM.pdf [file 41431_2022_1217_MOESM4_ESM.pdf]

**A 25 Mainland Chinese cohort of patients with PURA-related  
neurodevelopmental disorders: clinical delineation and genotype–  
phenotype correlations**

Wei-qian Dai<sup>1</sup>, Yu Sun<sup>1</sup>, Yan-jie Fan<sup>1</sup>, Yan Gao<sup>1</sup>, Yong-kun Zhan<sup>1</sup>, Lili Wang<sup>1</sup>, Bing Xiao<sup>1</sup>,  
Wenjuan Qiu<sup>1</sup>, Xuefan Gu<sup>1</sup>, Kun Sun<sup>2\*</sup>, Yongguo Yu<sup>1\*</sup>, Na Xu<sup>1\*</sup>

<sup>1</sup>Department of Pediatric Endocrinology and Genetics, Xinhua Hospital Affiliated to Shanghai  
Jiao Tong University School of Medicine; Shanghai Institute for Pediatric Research, Shanghai,  
200092, China

<sup>2</sup>Center of Clinical Genetics, Xinhua Hospital Affiliated to Shanghai Jiao Tong University  
School of Medicine; Shanghai, 200092, China

\* Equal contribution as co-corresponding author

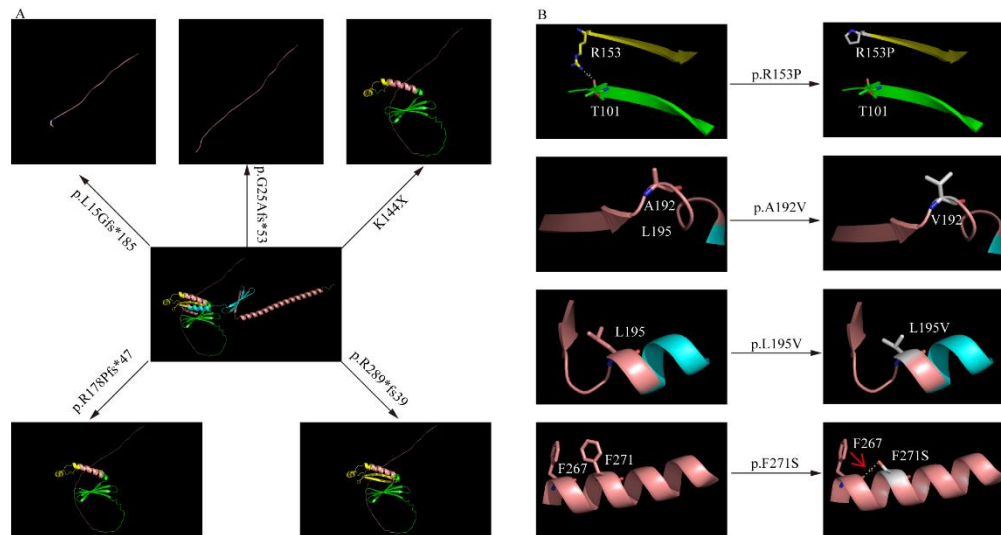

**Supplementary Fig. S1:** The effects of *PURA* variants on protein structure. The representation of the structure of human *PURA* (GenBank: NP\_005850.1) was predicted by alphafold (The red arrow indicates the H-bonds). PUR-I domain, PUR-II domain and PUR-III domain is respectively shown in green, yellow and cyan. (A) The effects of loss-of-function variants on protein structure. (B) The effects of missense variants on protein structure.

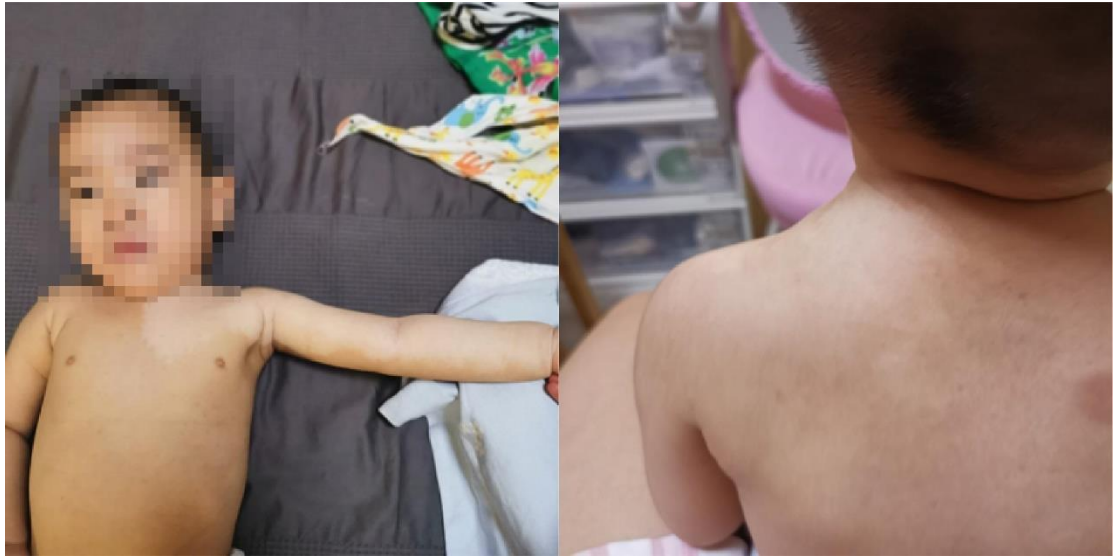

**Supplementary Fig. S2:** Large areas of lightened skin pigmentation of patient 7 was shown.

Table S3. Summarization of *PURA* gene variants in 24 patients with PURA syndrome (including detailed ACMG classification)

| Patient | Variant      | Protein change | ACMG classification                        | Pathogenicity          |
|---------|--------------|----------------|--------------------------------------------|------------------------|
| P1      | c.159dup     | p.L54Afs*147   | PM2+PVS1-Strong+PS2+PS4-Supporting+PP4(P)  | Pathogenic             |
| P2      | c.42_43del   | p.L15Gfs*185   | PM2+PVS1-Strong +PS2-Moderate+PP4(LP)      | Likely pathogenic      |
| P3      | c.159dup     | p.L54Afs*147   | PM2+PVS1-Strong+PS2+PS4-Supporting +PP4(P) | Pathogenic             |
| P4      | c.697_699del | p.F233del      | PM2+PM4+PM6-Supporting+PS4+PP4 (P)         | Pathogenic             |
| P5      | c.449delG    | p.R150Pfs*75   | PM2+PVS1-Strong +PS2+PP4(P)                | Pathogenic             |
| P6      | c.159dup     | p.L54Afs*147   | PM2+PVS1-Strong+PM6+PS4-Supporting+PP4(P)  | Pathogenic             |
| P7      | c.697_699del | p.F233del      | PM2+PM4+PM6-Supporting+PP4+PS4 (P)         | Pathogenic             |
| P8      | c.159dup     | p.L54Afs*147   | PM2+PVS1-Strong+PM6+PS4-Supporting+PP4(P)  | Pathogenic             |
| P9      | c.692T>G     | p.F231C        | PM2+PM5+PM6-Supporting+PP4(LP)             | Likely pathogenic      |
| P10     | c.575C>T     | p.A192V        | PM2+PM1+PM6-Supporting+PP4(LP)             | Likely pathogenic      |
| P11     | c.458G>C     | p.R153P        | PM2+PM6-Supporting+PP4(VUS)                | Uncertain significance |
| P12     | c.531del     | p.P178Lfs*47   | PM2+PVS1-Strong +PS2+PP4(P)                | Pathogenic             |
| P13     | c.10C>T      | p.R4X          | PM2+PVS1-Strong +PS2-Moderate+PP4(LP)      | Likely Pathogenic      |
| P14     | c.583C>G     | p.L195V        | PM2+PM6-Supporting+PP4(VUS)                | Uncertain significance |
| P15     | c.865delC    | p.R289fs*39    | PM2+PVS1-Strong+PS2-Supporting(LP)         | Likely pathogenic      |
| P16     | c.812T>C     | p.F271S        | PM2+PS2-Supporting+PP3(VUS)                | Uncertain significance |
| P17     | c.72delC     | p.G25Afs*53    | PM2+PVS1-Strong +PS2+PP4(P)                | Pathogenic             |
| P18     | c.506G>C     | p.R169P        | PM2+PP3+PS2+PP4(LP)                        | Likely pathogenic      |
| P19     | c.697_699del | p.F233del      | PM2+PM4+PM6-Supporting+PS4+PP4(P)          | Pathogenic             |
| P20     | c.697_699del | p.F233del      | PM2+PM4+PM6-Supporting+PS4+PP4(P)          | Pathogenic             |
| P21     | c.218T>G     | p.F73C         | PM2+ PS2+PP4(LP)                           | Likely pathogenic      |
| P22     | c.550C>T     | p.Q184Ter      | PM2+PVS1-Strong +PM6-Supporting (LP)       | Likely pathogenic      |
| P23     | c.149_156dup | p.G53Pfs*28    | PM2+PVS1-Strong +PM6+PP4(LP)               | Likely pathogenic      |

---

|     |          |         |                                   |                   |
|-----|----------|---------|-----------------------------------|-------------------|
| P24 | c.430A>T | p.K144X | PM2+PVS1-Strong +PS2-Moderate(LP) | Likely pathogenic |
|-----|----------|---------|-----------------------------------|-------------------|

---
